# Supplementary material for: A Simple Hydrophilic Palladium(II) Complex as a Highly Efficient Catalyst for Room Temperature Aerobic Suzuki Coupling Reactions in Aqueous Media
Source: MDPI journal article supplement (doi:10.3390/molecules19056524), 2014-05-21

# Supplementary Materials

## 1. Characterization of Palladium(II) Complex 2

**Figure S1.** ES-MS spectrum of Palladium(II) Complex 2.

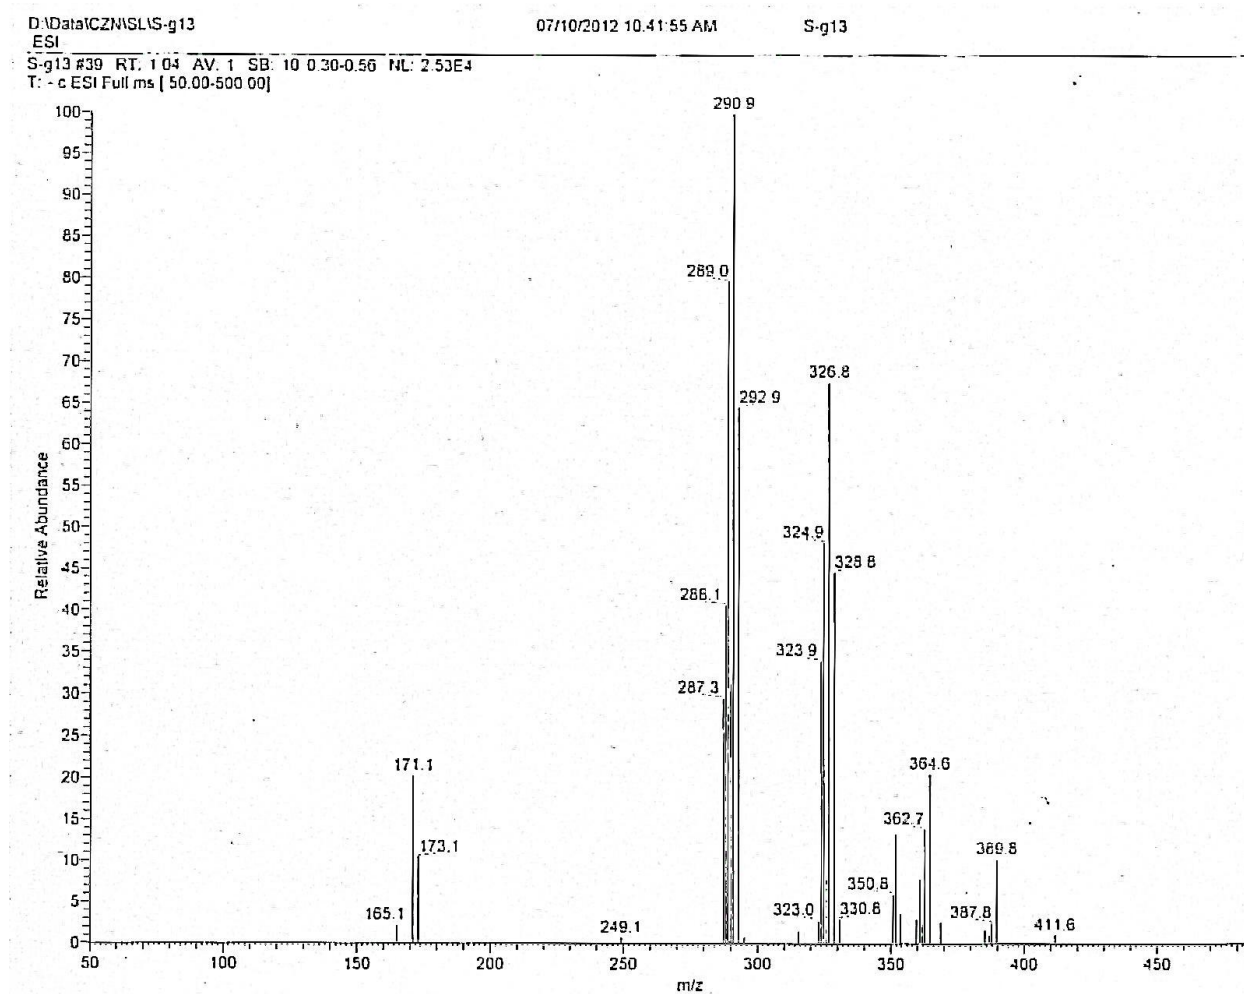

## 2. Characterization of the Products

**Figure S2.** Copy of  $^1\text{H}$ -NMR for 4,4'-dimethylbiphenyl.

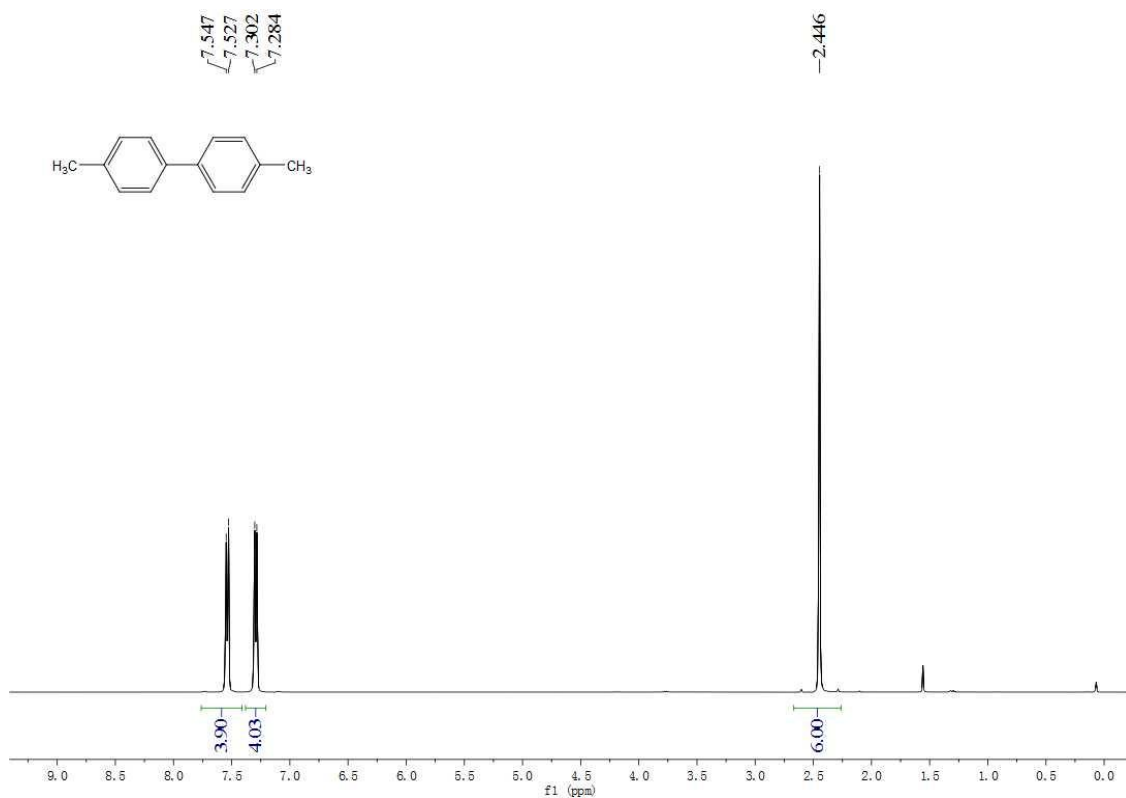

**Figure S3.** Copy of  $^{13}\text{C}$ -NMR for 4,4'-dimethylbiphenyl.

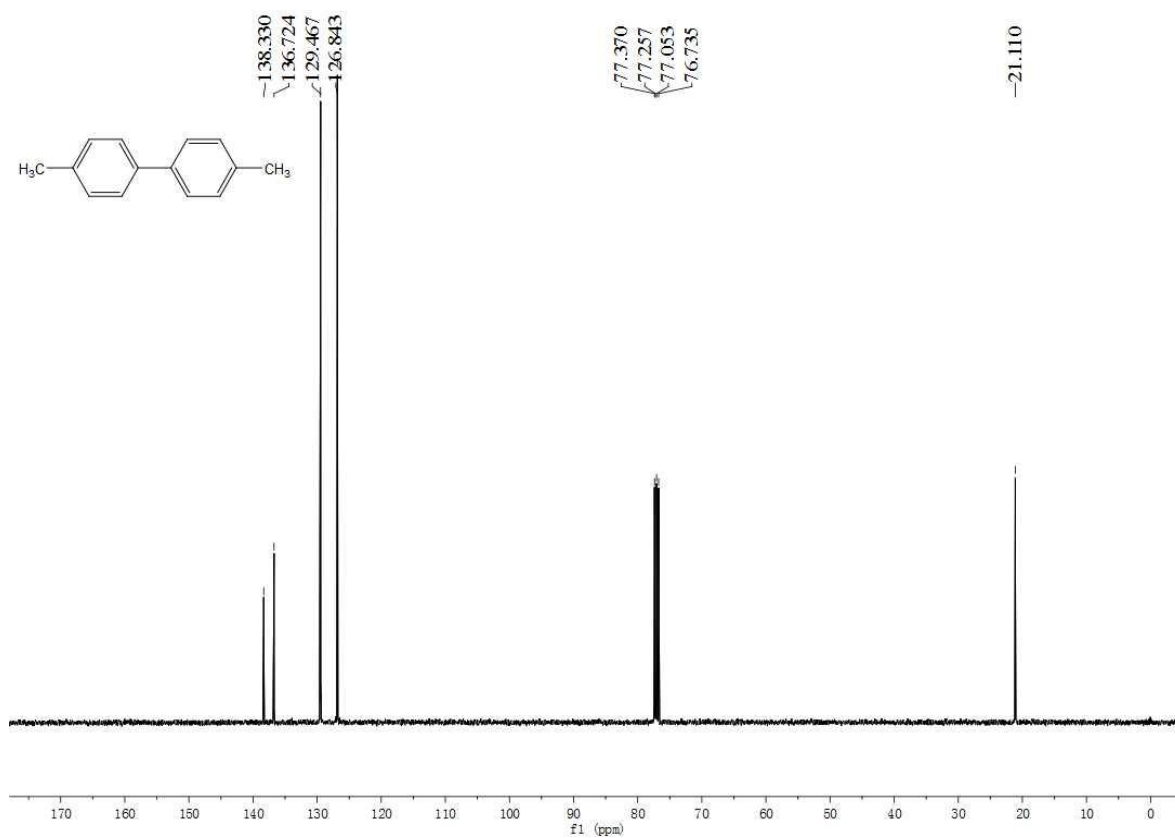

**Figure S4.** Copy of  $^1\text{H}$ -NMR for biphenyl.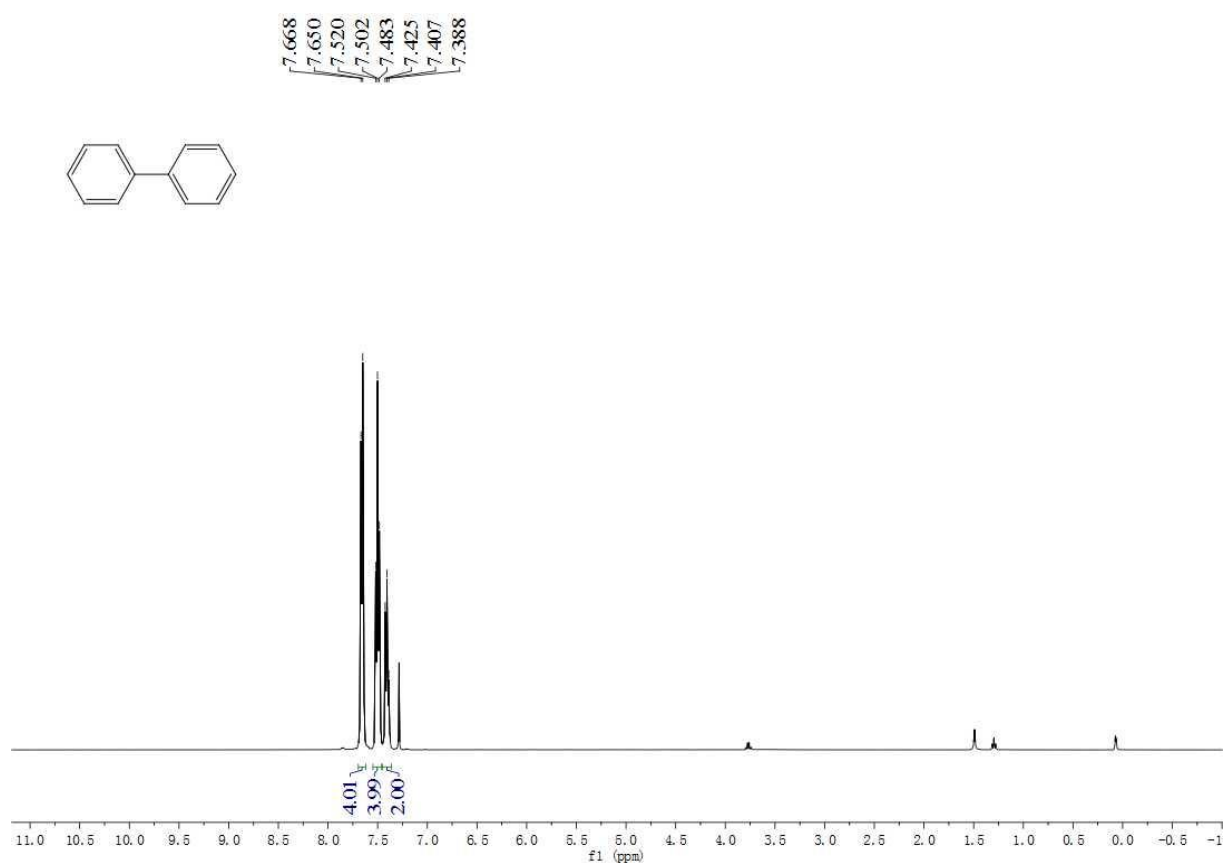**Figure S5.** Copy of  $^{13}\text{C}$ -NMR for biphenyl.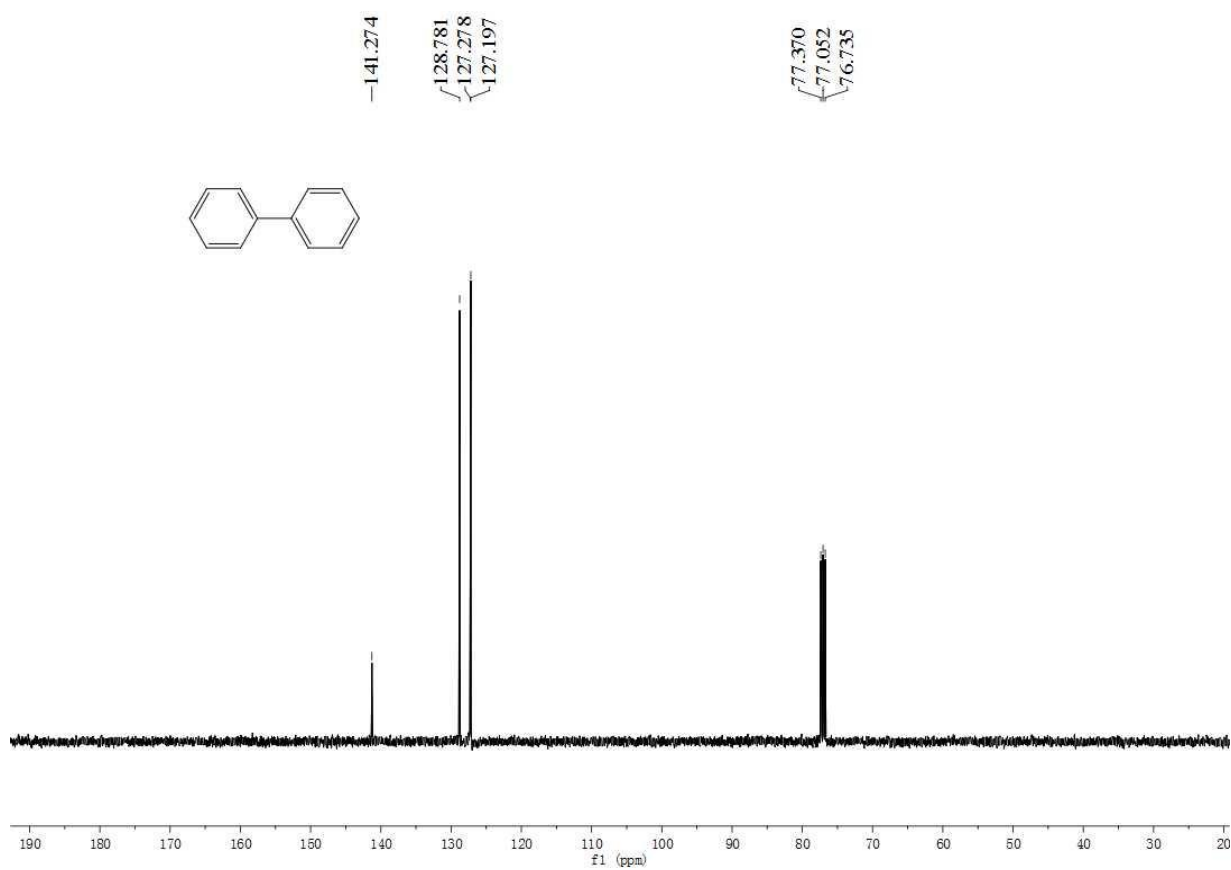

**Figure S6.** Copy of  $^1\text{H}$ -NMR for 4-methoxybiphenyl.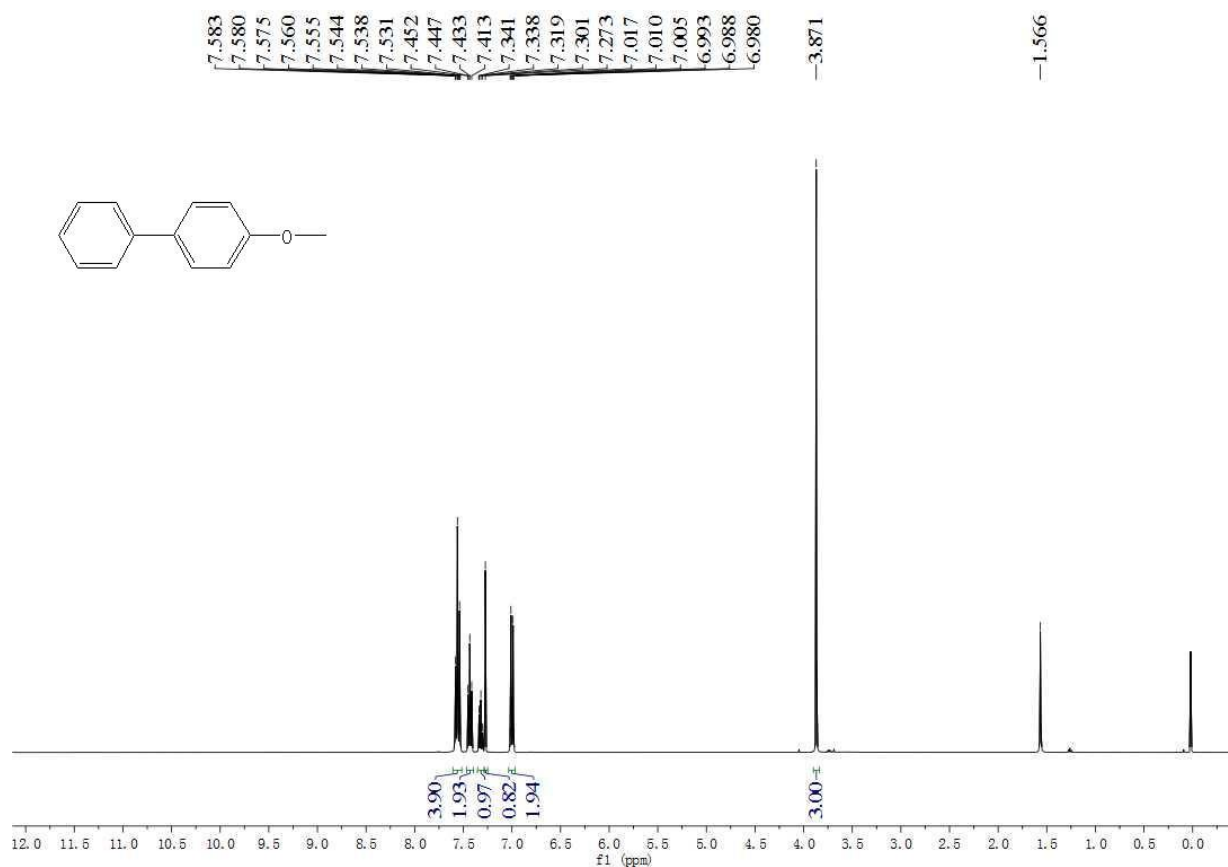**Figure S7.** Copy of  $^{13}\text{C}$ -NMR for 4-methoxybiphenyl.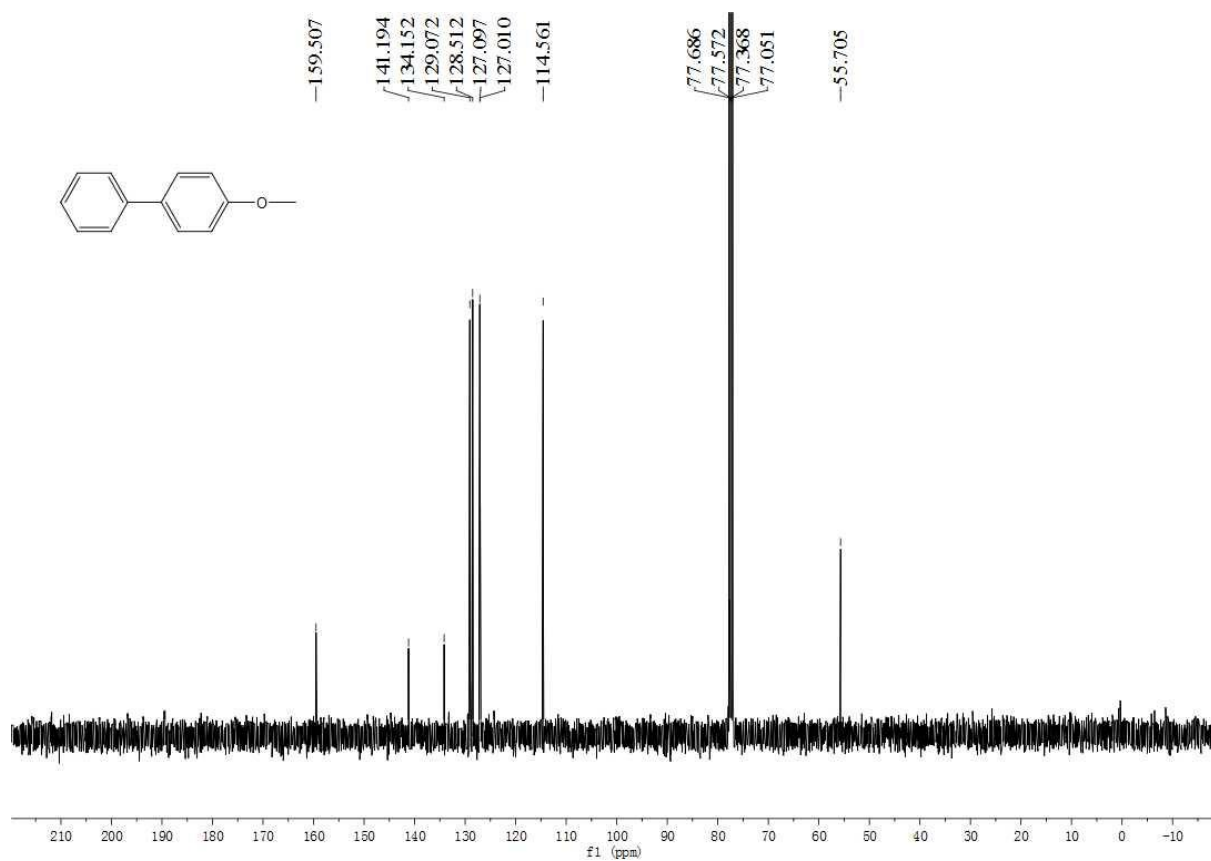

**Figure S8.** Copy of  $^1\text{H}$ -NMR for 4-methylbiphenyl.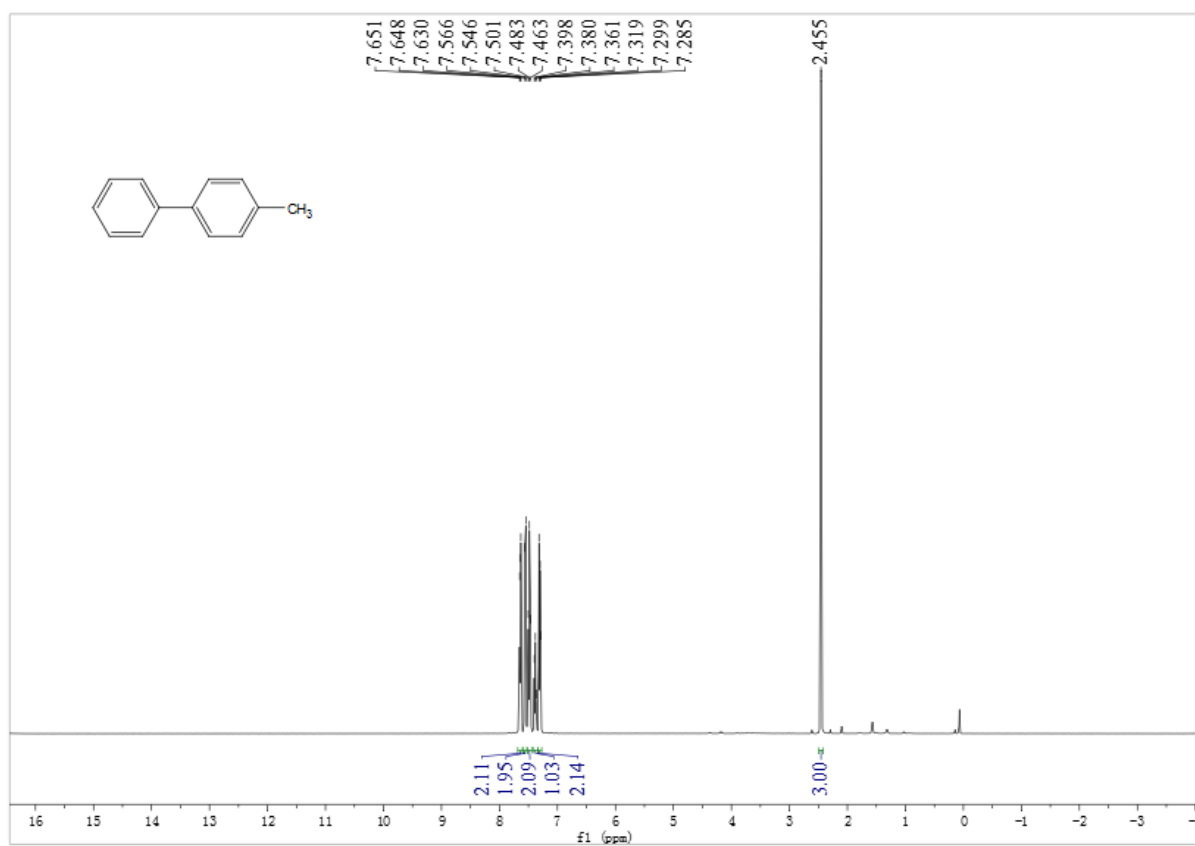**Figure S9.** Copy of  $^{13}\text{C}$ -NMR for 4-methylbiphenyl.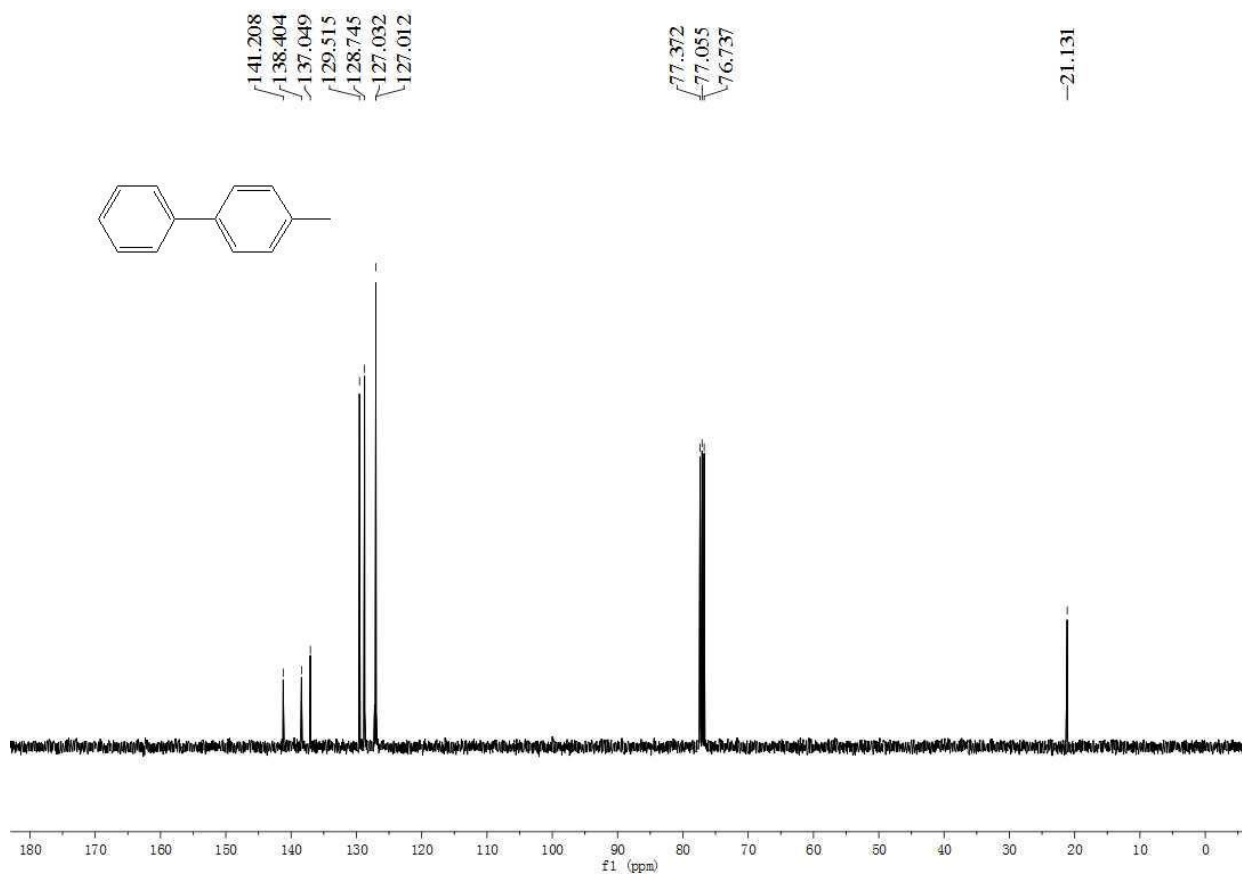

**Figure S10.** Copy of  $^1\text{H}$ -NMR for 4-acetyl-4'-methylbiphenyl.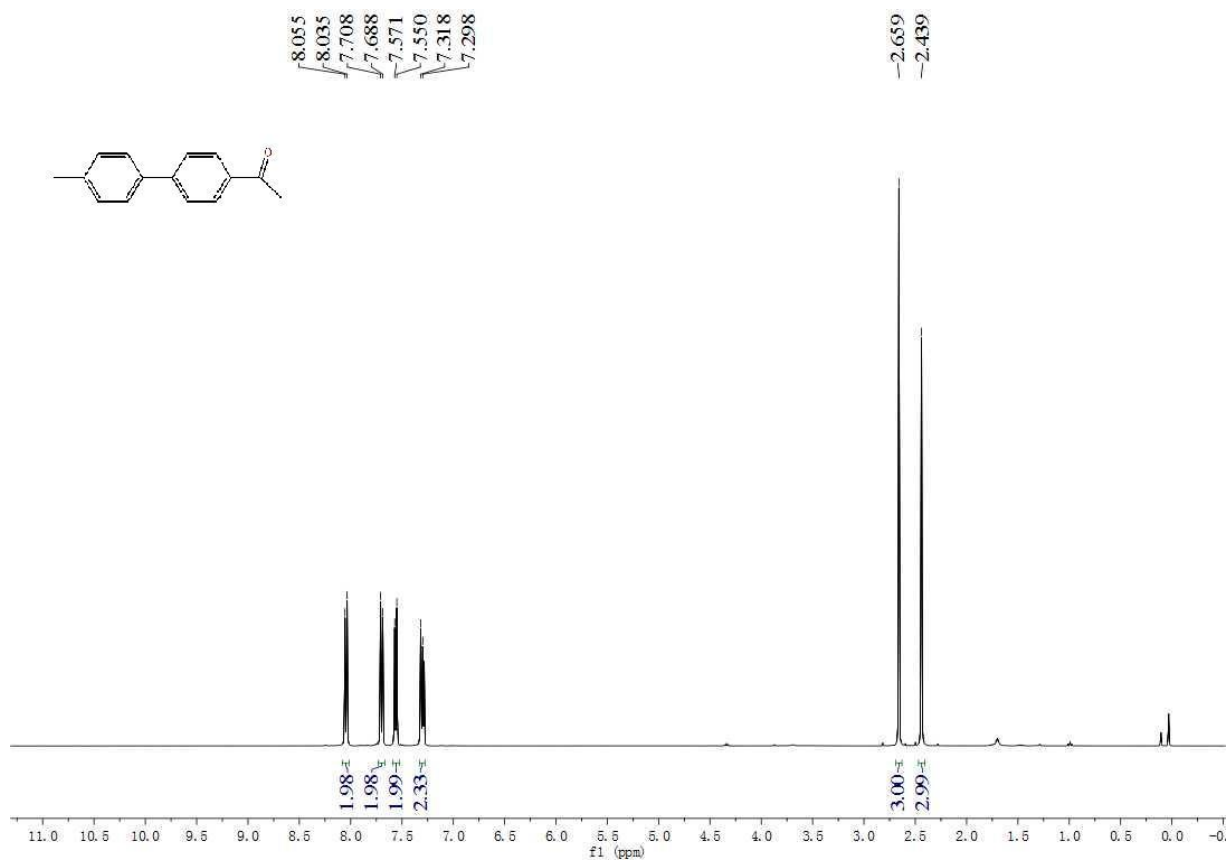**Figure S11.** Copy of  $^{13}\text{C}$ -NMR for 4-acetyl-4'-methylbiphenyl.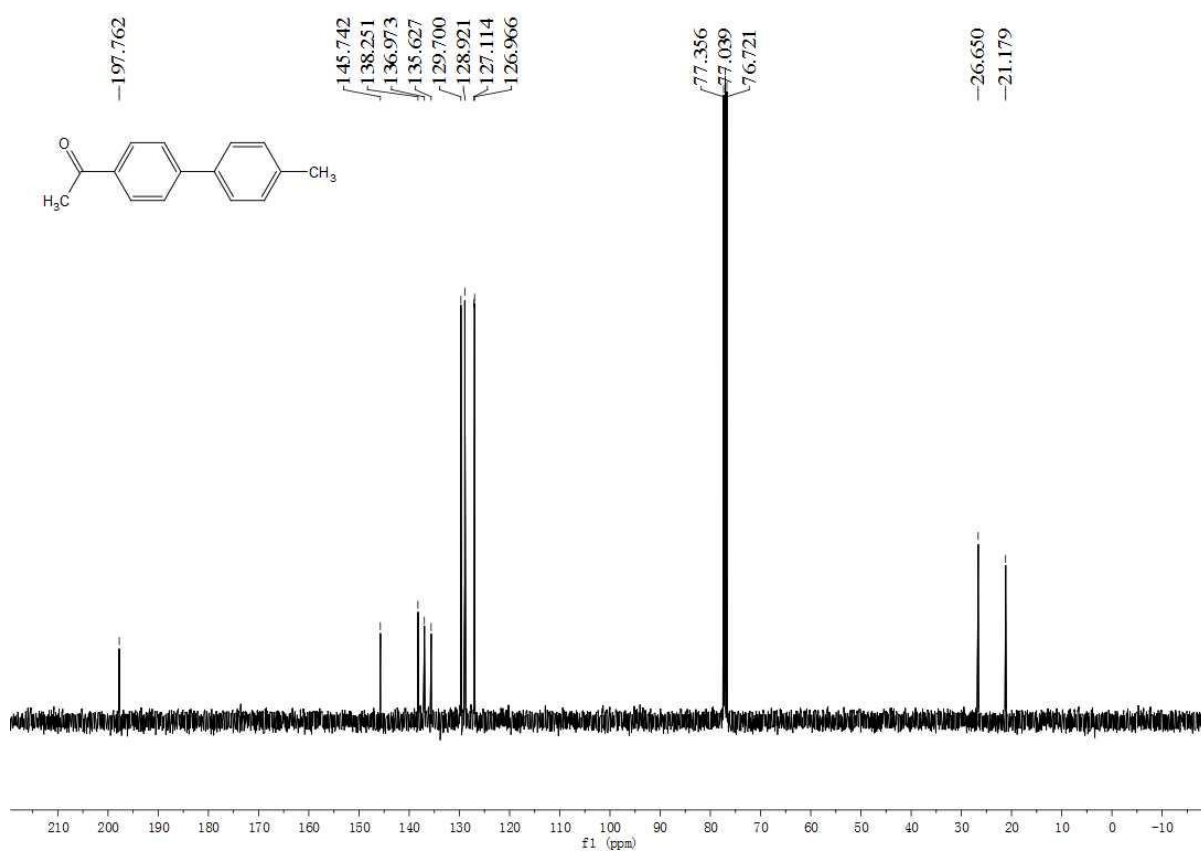

**Figure S12.** Copy of  $^1\text{H}$ -NMR for 4-acetyl-4'-methoxybiphenyl.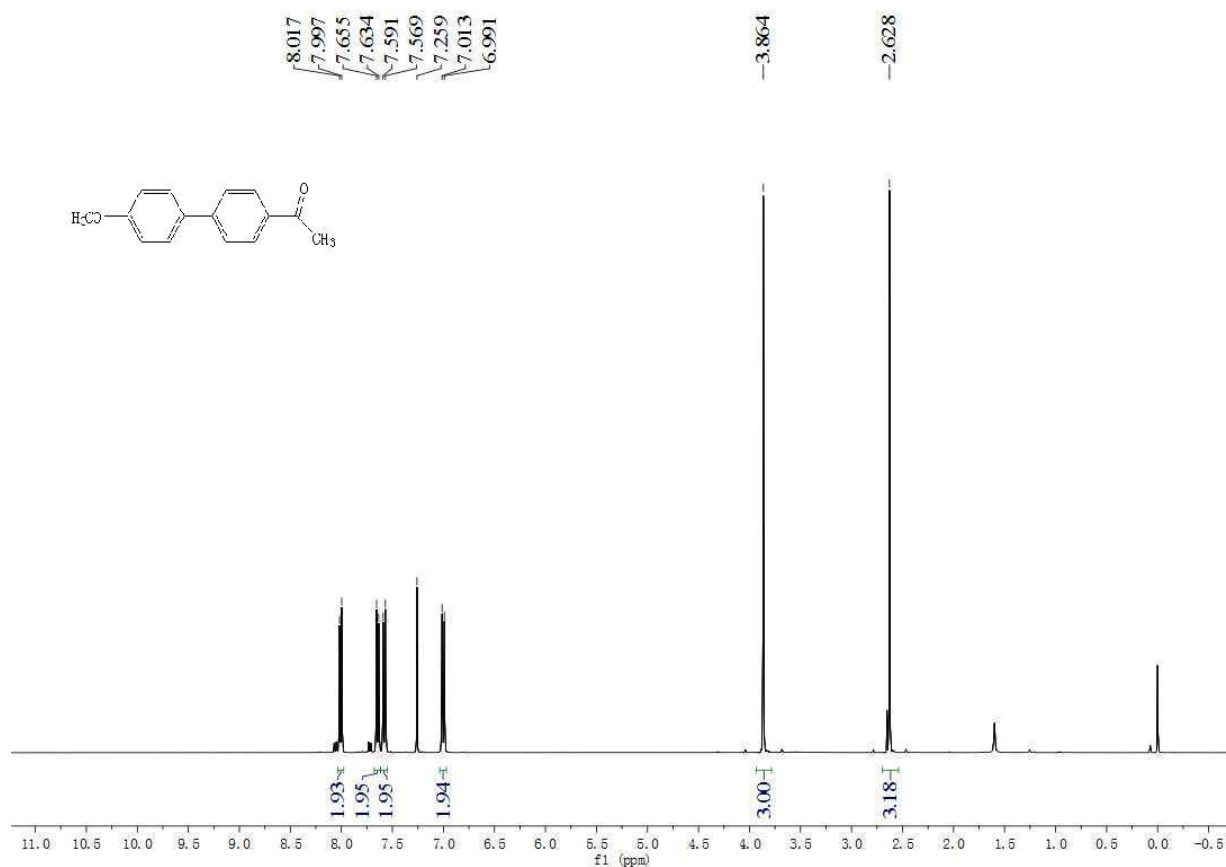**Figure S13.** Copy of  $^{13}\text{C}$ -NMR for 4-acetyl-4'-methoxybiphenyl.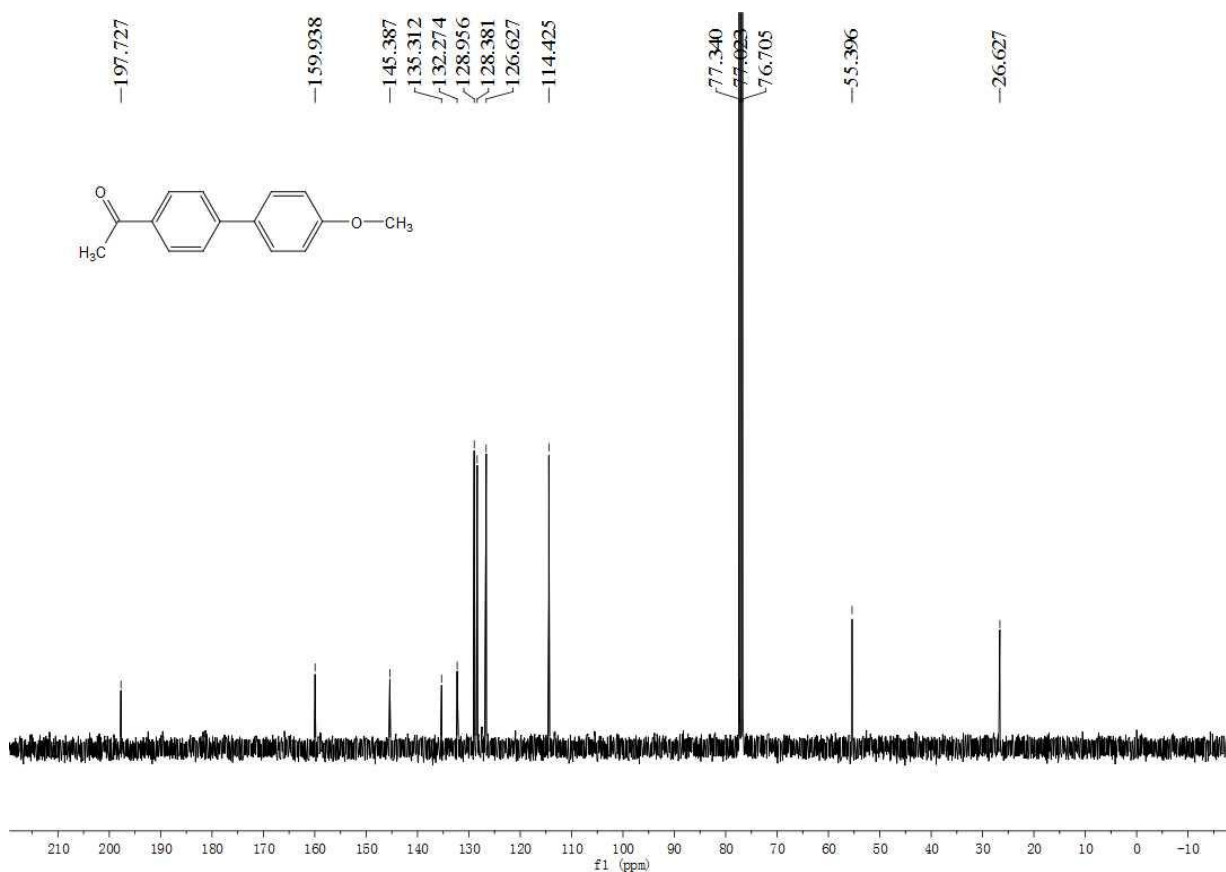

**Figure S14.** Copy of  $^1\text{H}$ -NMR for 2-methylbiphenyl.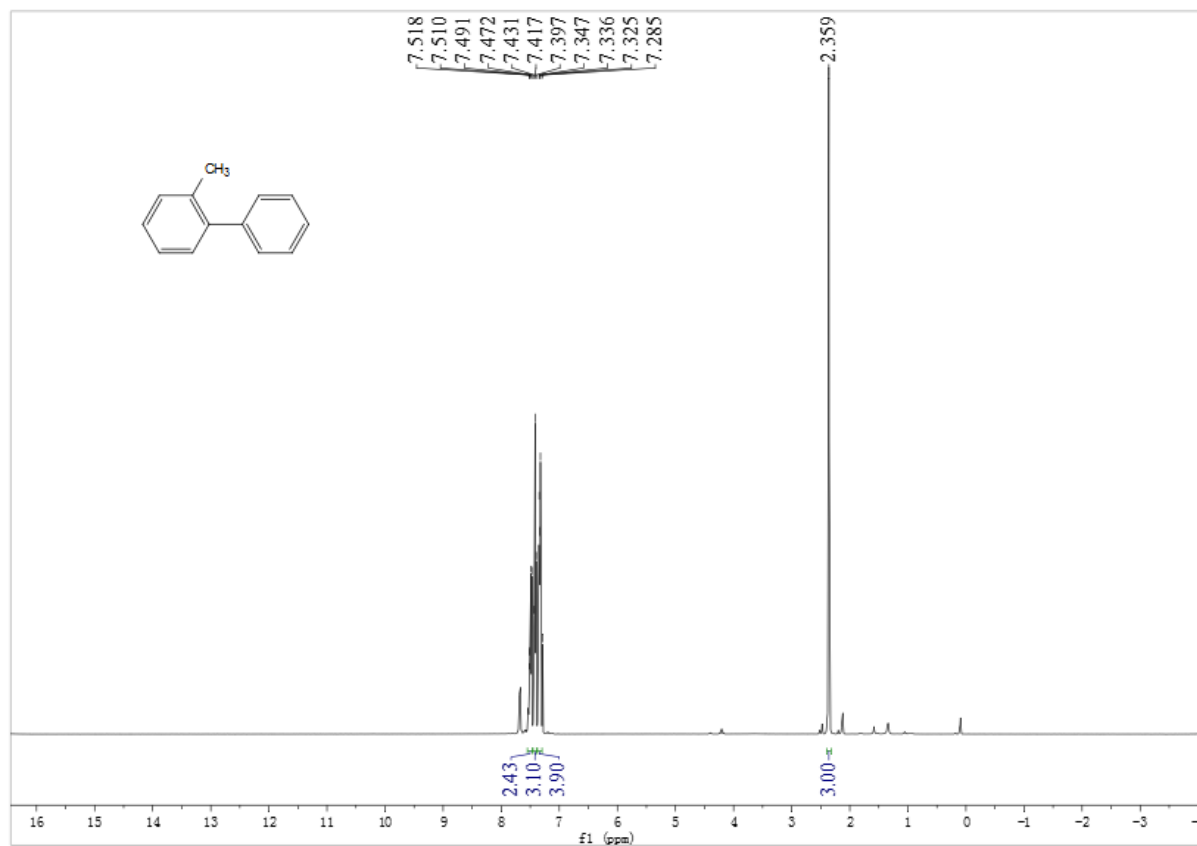**Figure S15.** Copy of  $^{13}\text{C}$ -NMR for 2-methylbiphenyl.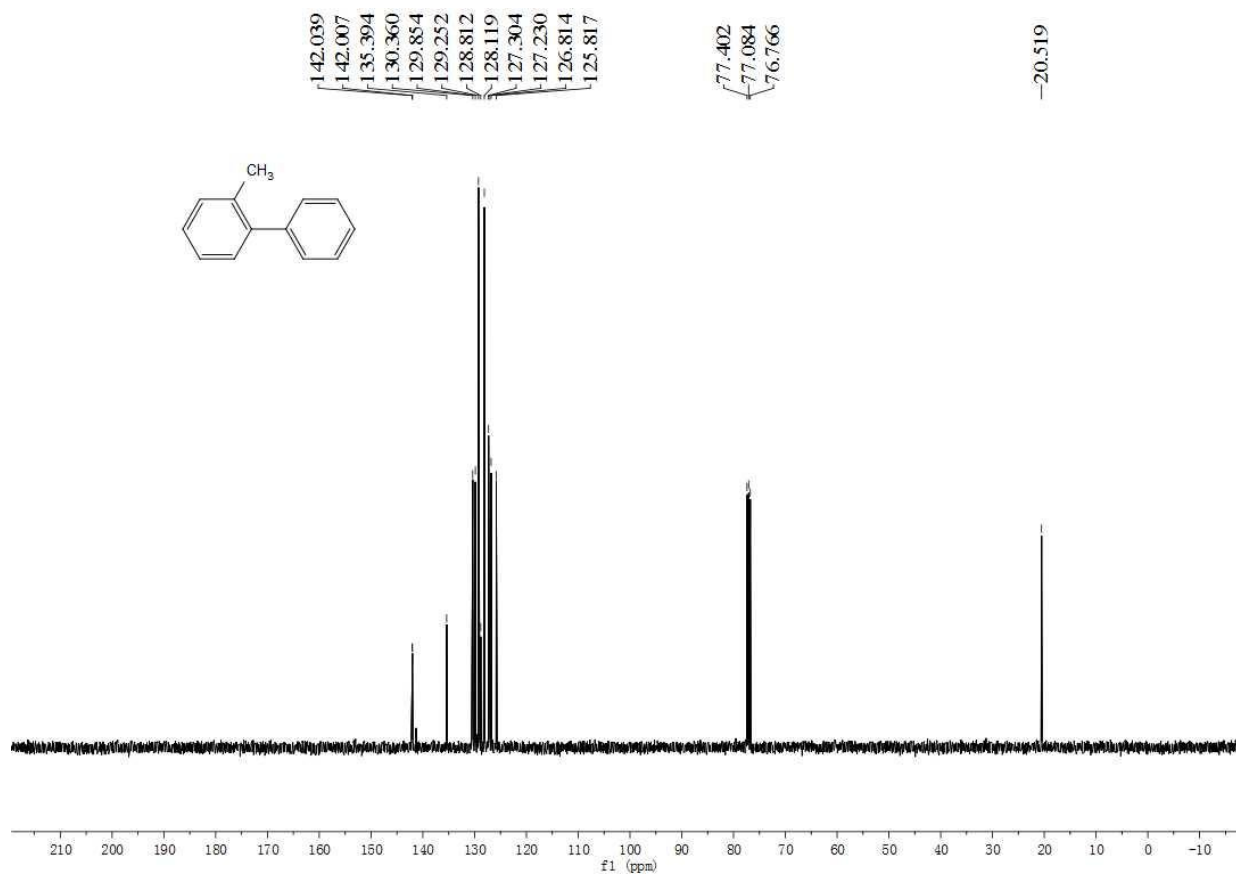

**Figure S16.** Copy of  $^1\text{H}$ -NMR for 2,4'-dimethylbiphenyl.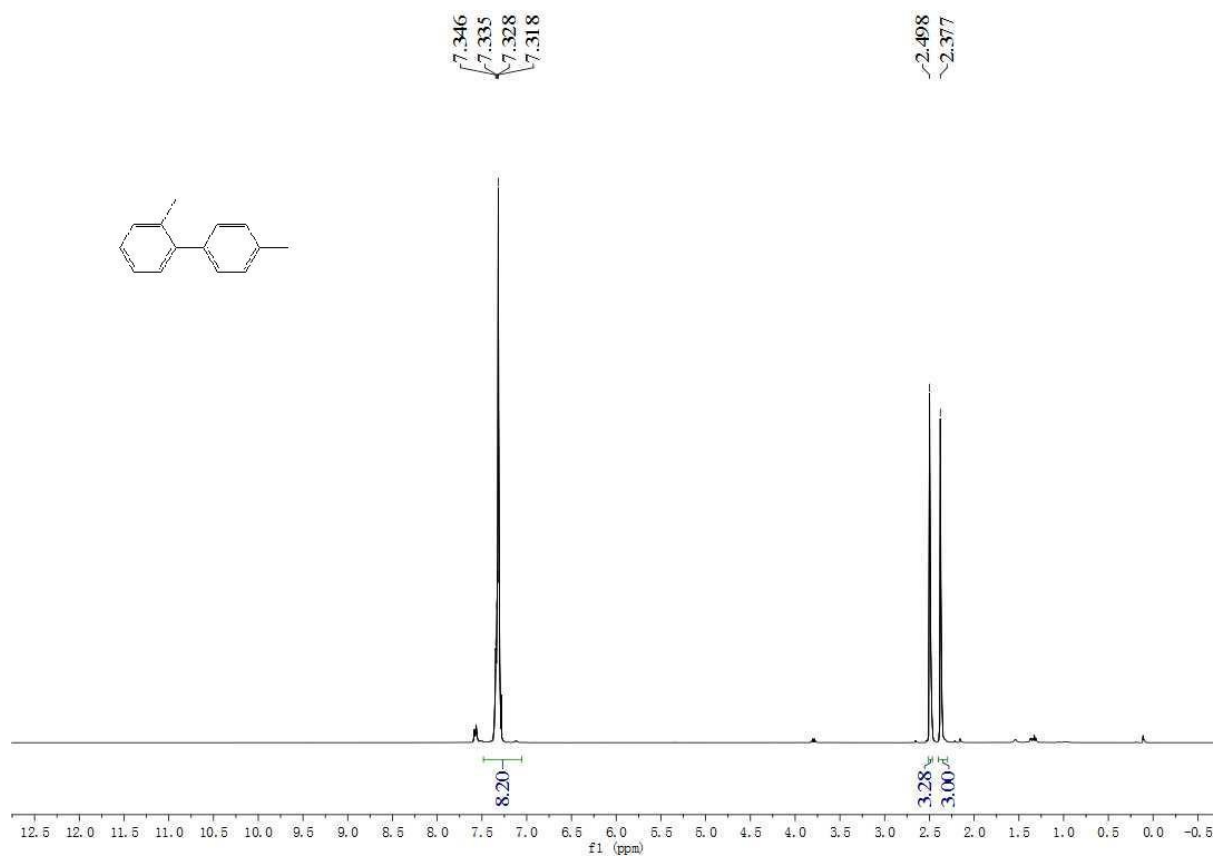**Figure S17.** Copy of  $^{13}\text{C}$ -NMR for 2,4'-dimethylbiphenyl.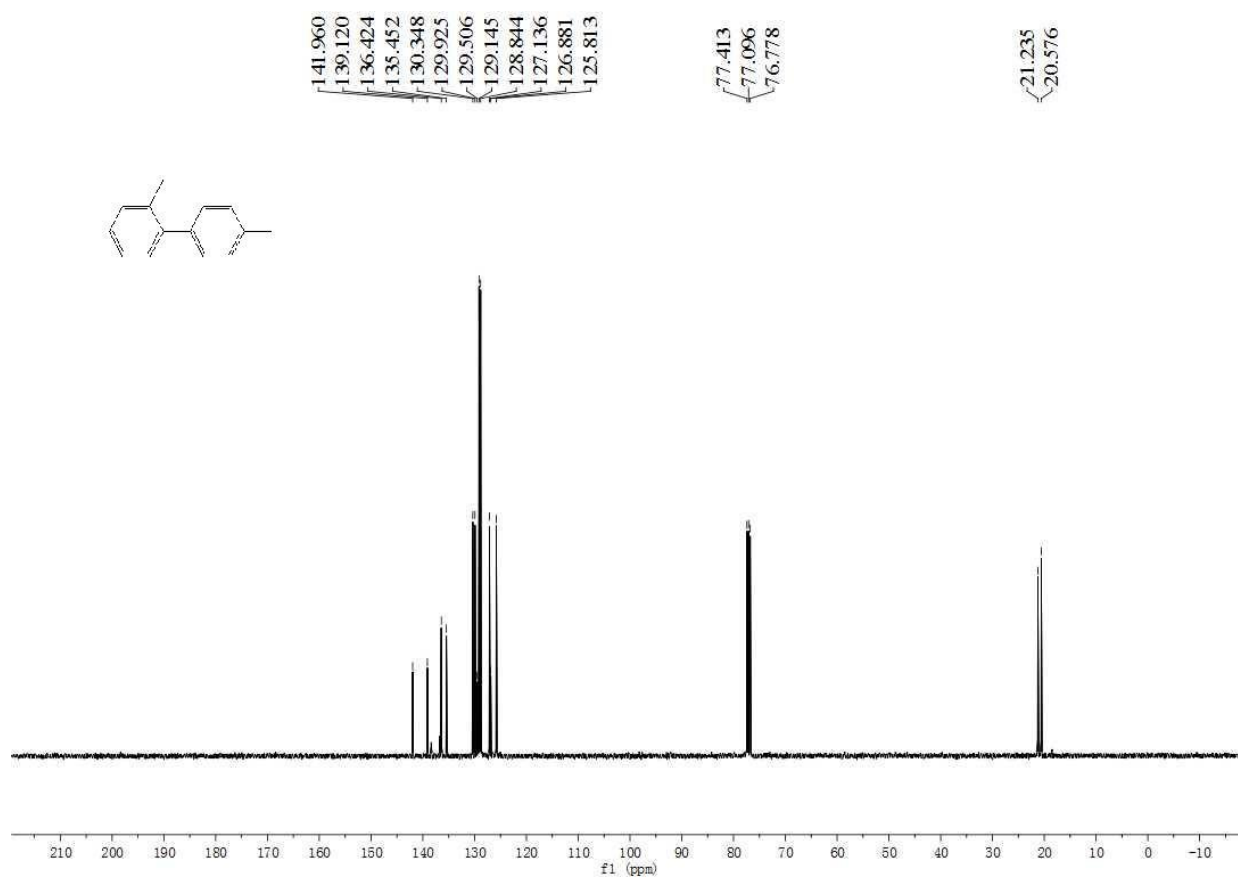

**Figure S18.** Copy of  $^1\text{H}$ -NMR for 4,4'-dimethoxybiphenyl.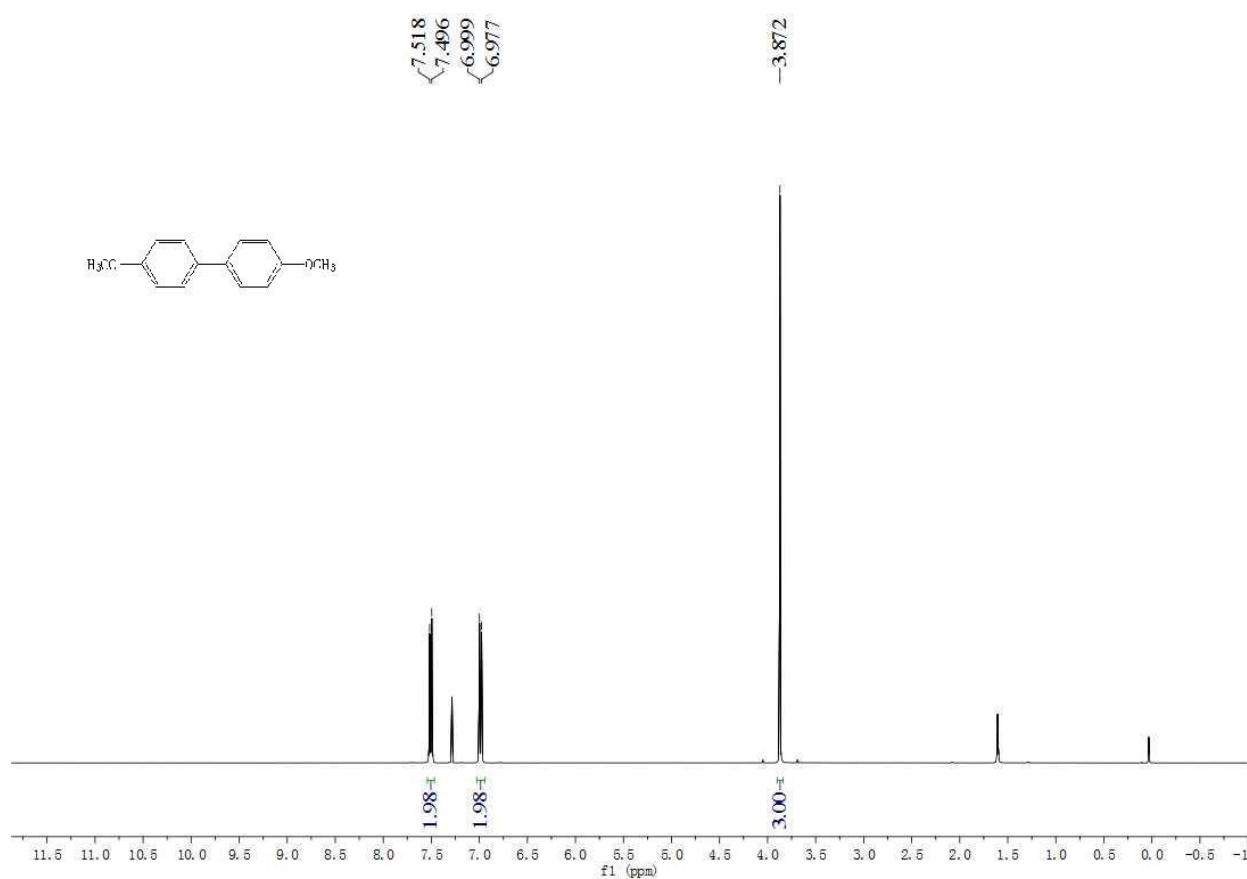**Figure S19.** Copy of  $^{13}\text{C}$ -NMR for 4,4'-dimethoxybiphenyl.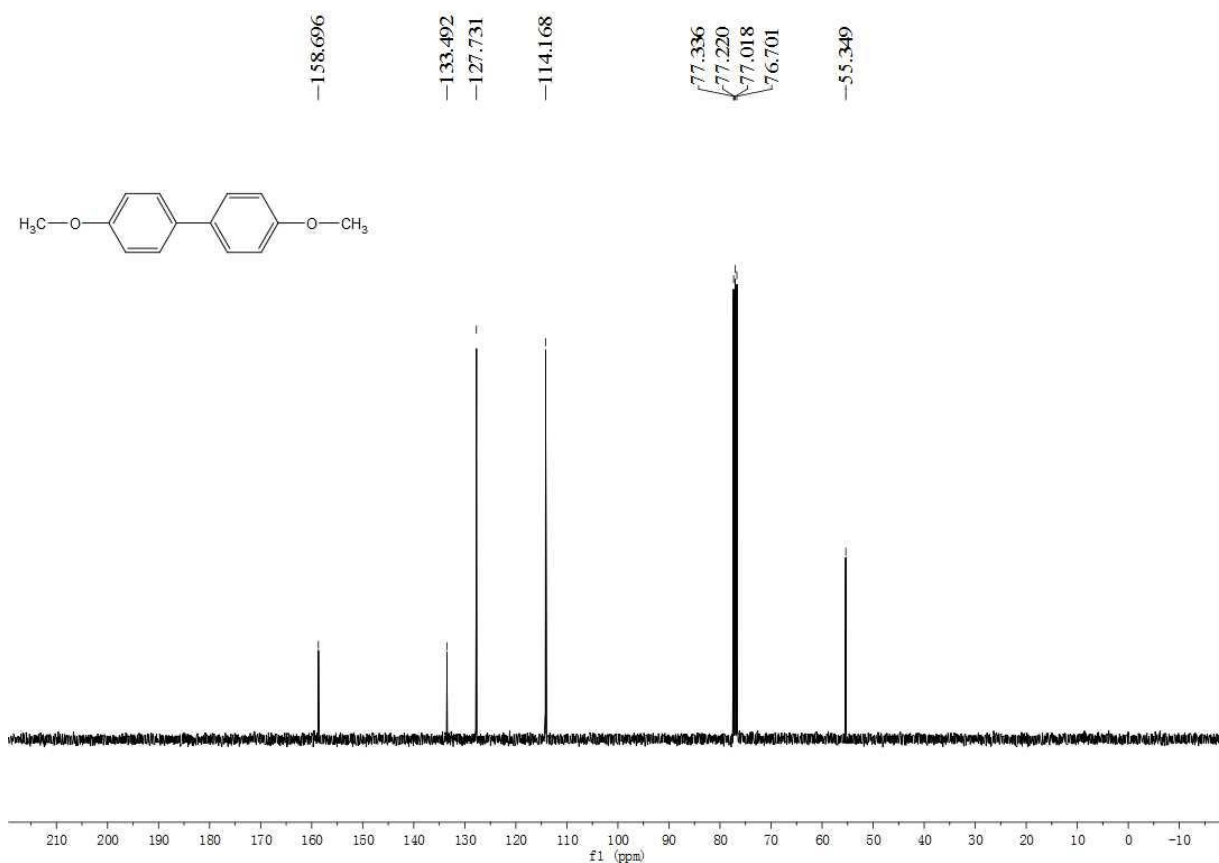

**Figure S20.** Copy of  $^1\text{H}$ -NMR for 4-cyanobiphenyl.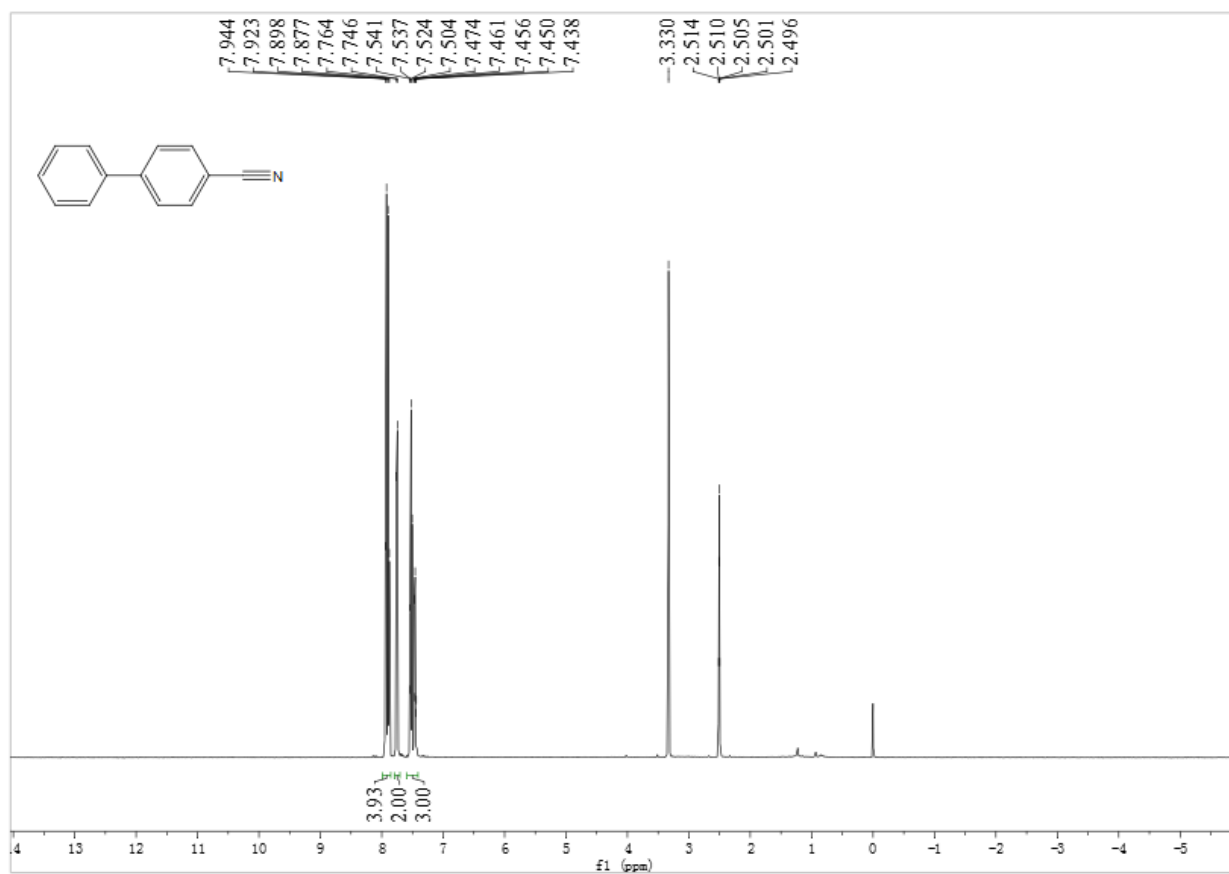**Figure S21.** Copy of  $^{13}\text{C}$ -NMR for 4-cyanobiphenyl.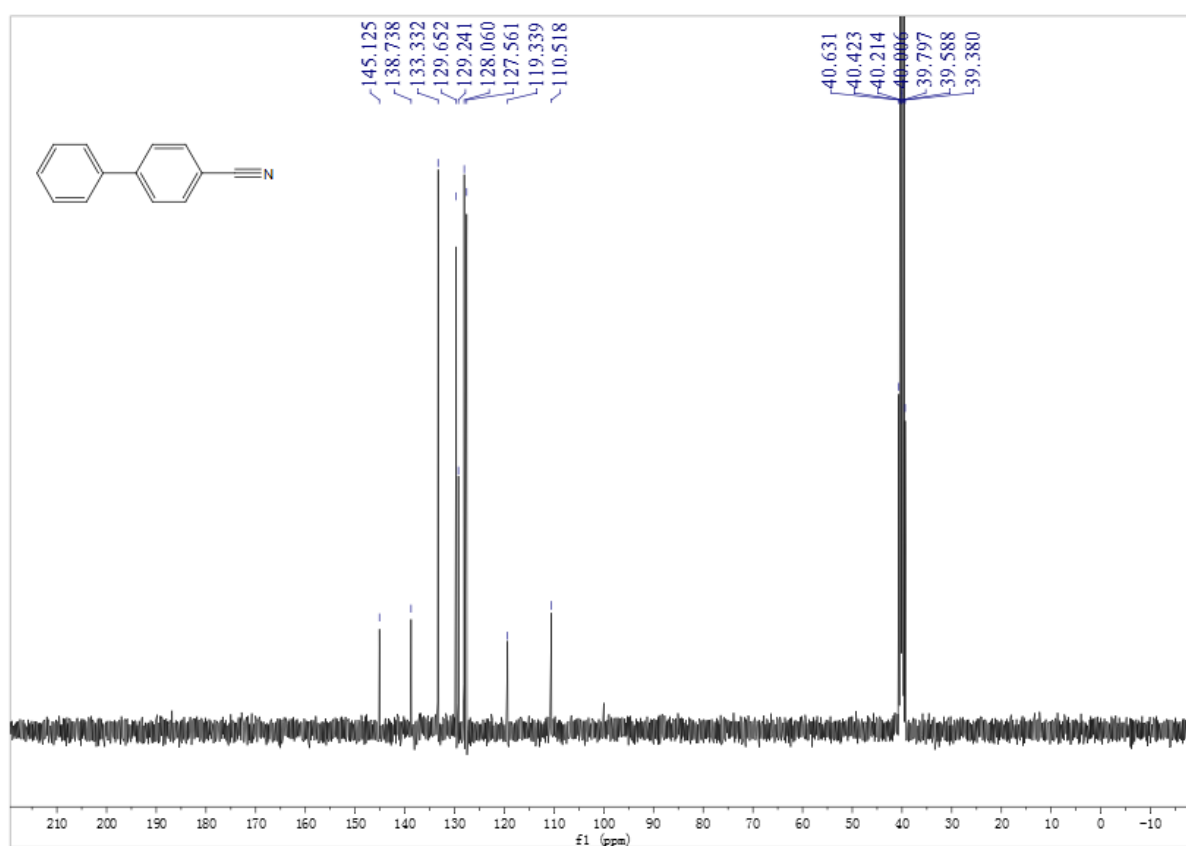

**Figure S22.** Copy of  $^1\text{H}$ -NMR for 4-nitrobiphenyl.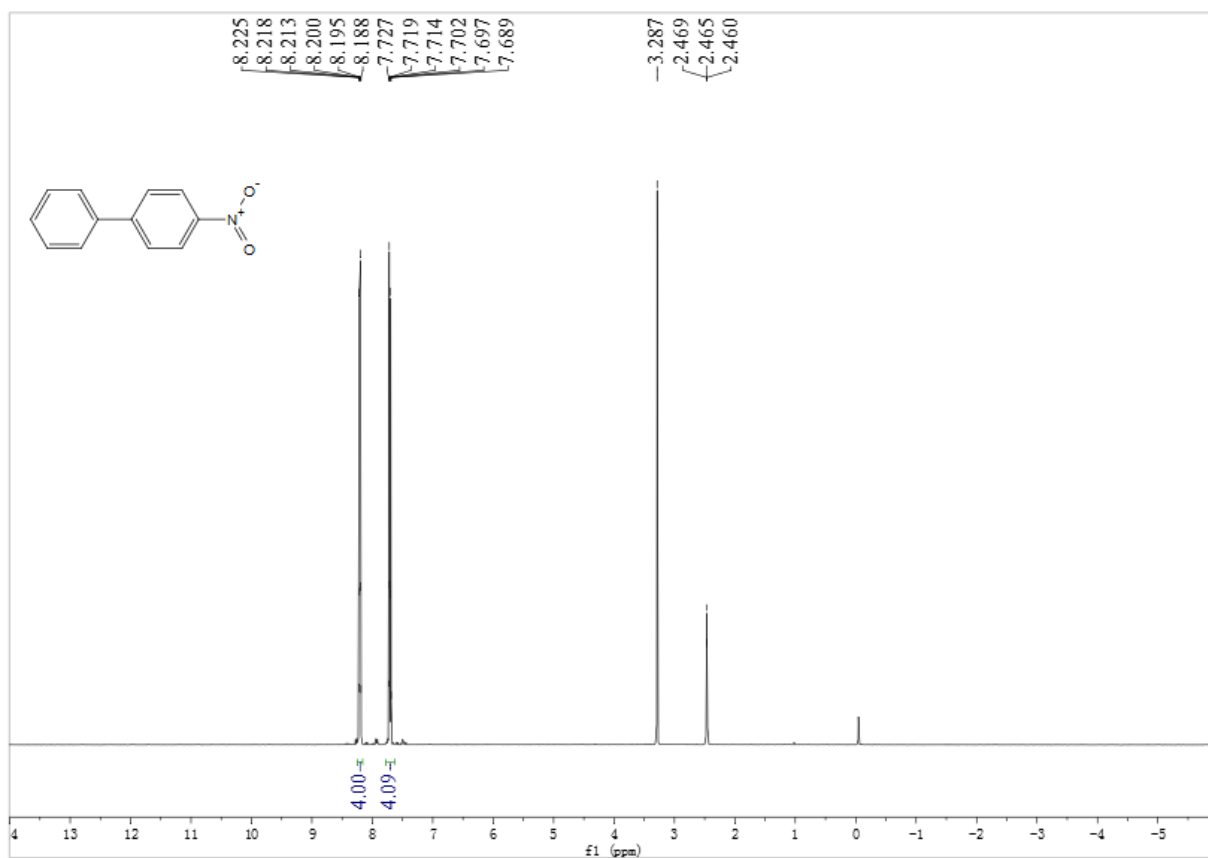**Figure S23.** Copy of  $^{13}\text{C}$ -NMR for 4-nitrobiphenyl.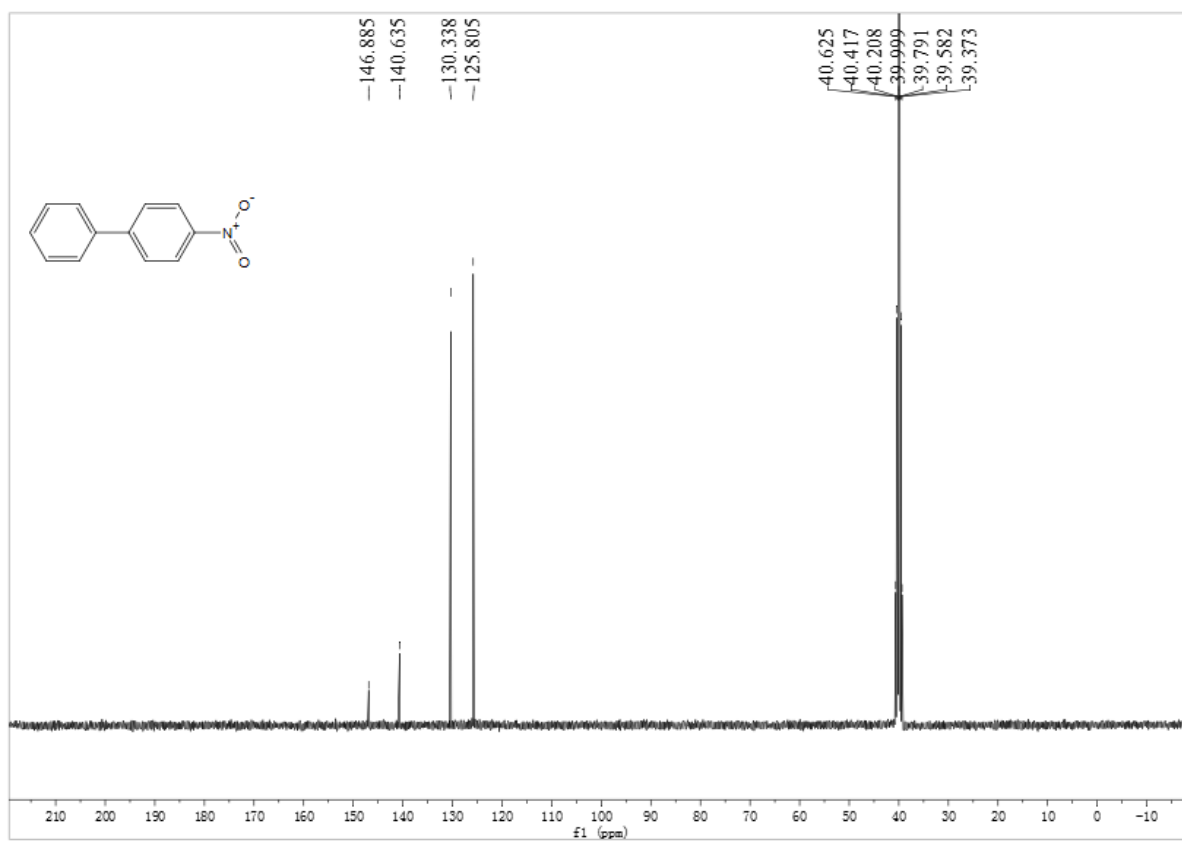

**Figure S24.** Copy of  $^1\text{H}$ -NMR for Methyl biphenyl-4-carboxylate.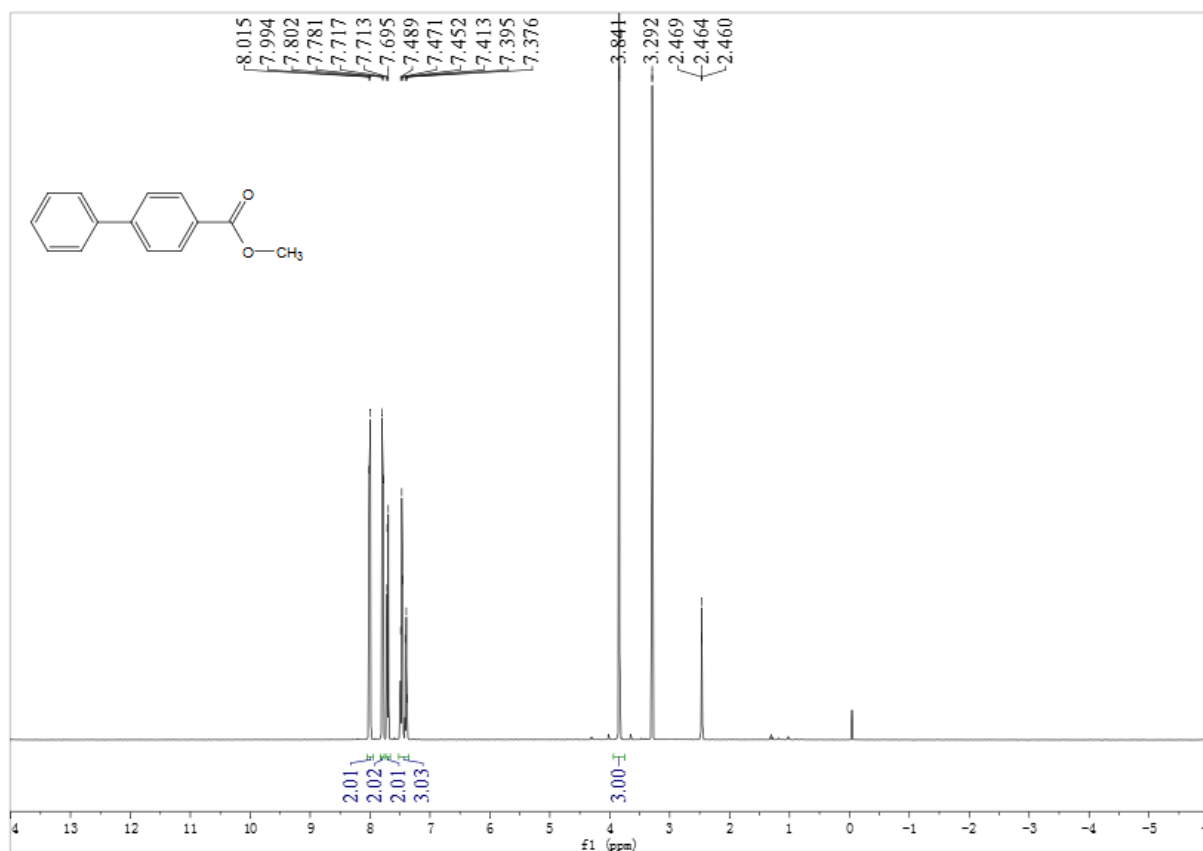**Figure S25.** Copy of  $^{13}\text{C}$ -NMR for Methyl biphenyl-4-carboxylate.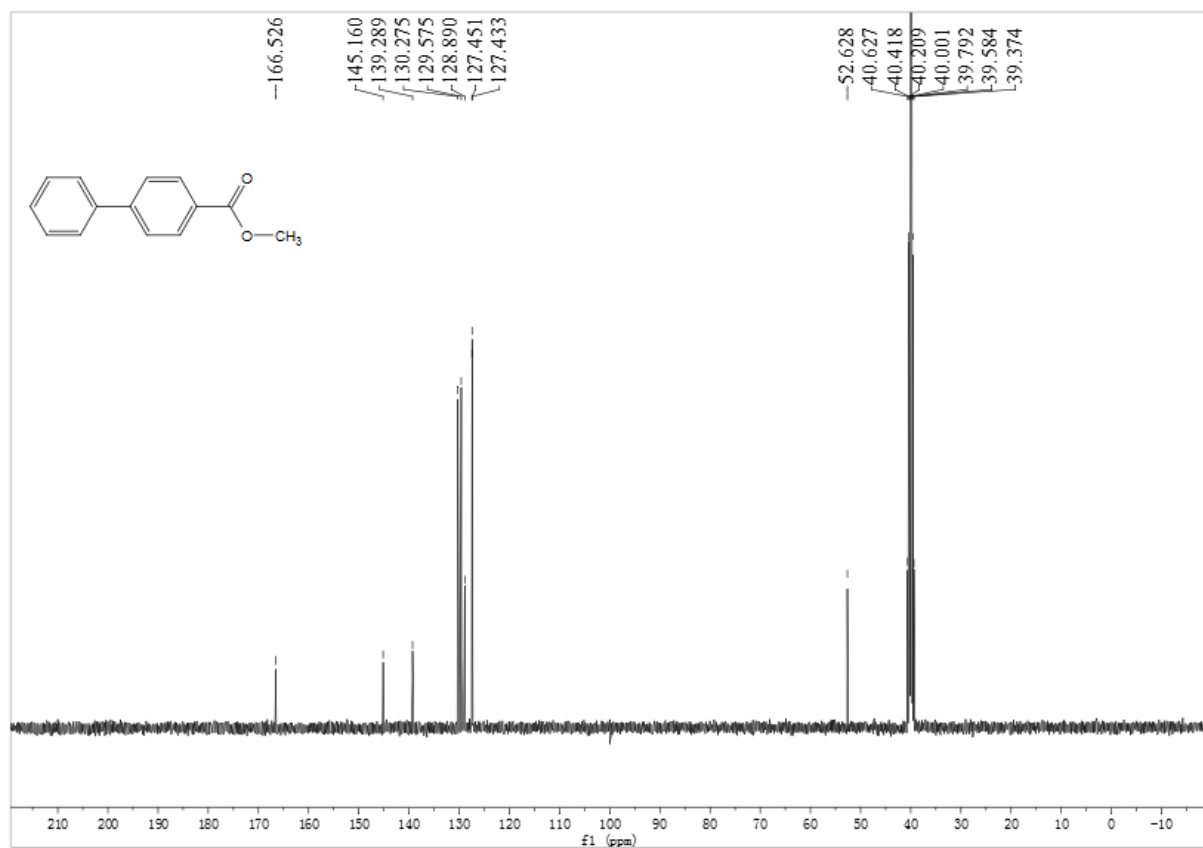

**Figure S26.** Copy of  $^1\text{H}$ -NMR for 4-acetylbiphenyl.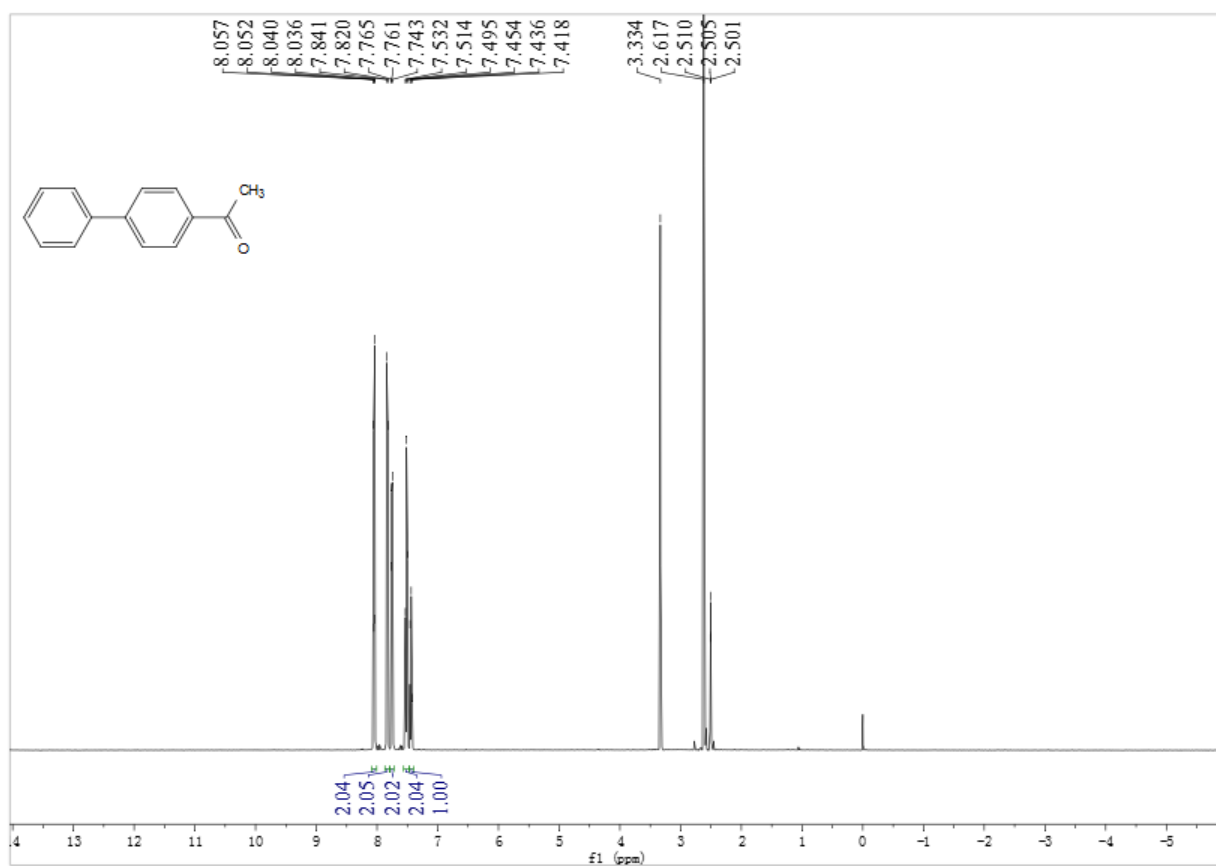**Figure S27.** Copy of  $^{13}\text{C}$ -NMR for 4-acetylbiphenyl.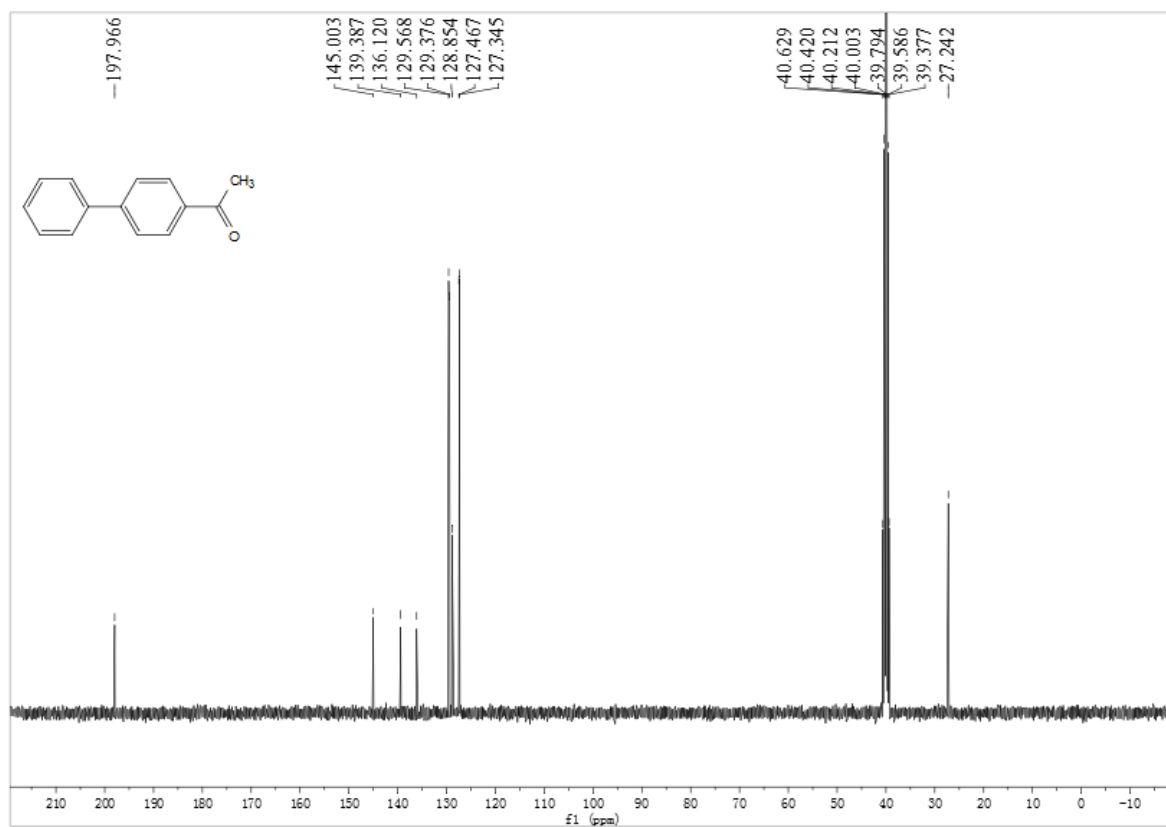

Supplement: s1 [file s1]
